# Supplementary material
Source: Springer Nature journal article supplement (https://www.springermedizin.de/resource/supplementary/12913_2012_2544_MOESM2_ESM.pdf/9532150)

# Signs of non-acceptable waiting

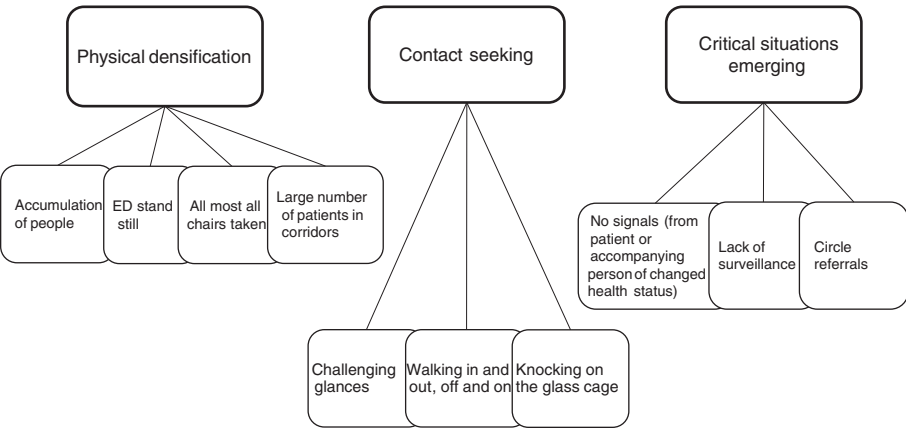

Supplement: MOESM2 [file 9532150]
